# Supplementary material for: Home Exercise Training Improves Exercise Capacity in Cirrhosis Patients: Role of Exercise Adherence
Source: PubMed Central journal article supplement (PMC5758716; doi:10.1038/s41598-017-18320-y), 2018-01-08

**Title:** Home Exercise Training Improves Exercise Capacity in Cirrhosis Patients:  
Role of Exercise Adherence

**Authors:** Calvin Kruger<sup>1,2</sup>, Margaret L. McNeely<sup>2</sup>, Robert J. Bailey<sup>3</sup>, Milad Yavari<sup>2</sup>, Juan G Abraldes<sup>1</sup>, Michelle Carbonneau<sup>1</sup>, Kim Newnham<sup>1</sup>, Vanessa DenHeyer<sup>1</sup>, Mang Ma<sup>1</sup>, Richard Thompson<sup>4</sup>, Ian Paterson<sup>5</sup>, Mark J. Haykowsky<sup>6\*\*</sup>, Puneeta Tandon<sup>1,2\*\*</sup>

\*\*These authors contributed equally as senior authors on the manuscript.

## Supplementary Figure 1 Legend

**Supplementary Fig.1:** Plot comparing the before and after peak  $\text{VO}_2$  values in patients in the control group and in the exercise (HET) group. Patients in the control group did not show changes in their peak  $\text{VO}_2$ . In patients in the HET group, higher baseline peak  $\text{VO}_2$  values were associated with higher chances of improvement in peak  $\text{VO}_2$  at the end of the study (regression lines represent a linear regression model, in which the predictor, baseline peak  $\text{VO}_2$ , was modelled with cubic splines with 2 knots; grey bands represent the 95% CIs of the predictions).

## Supplementary Figure 1

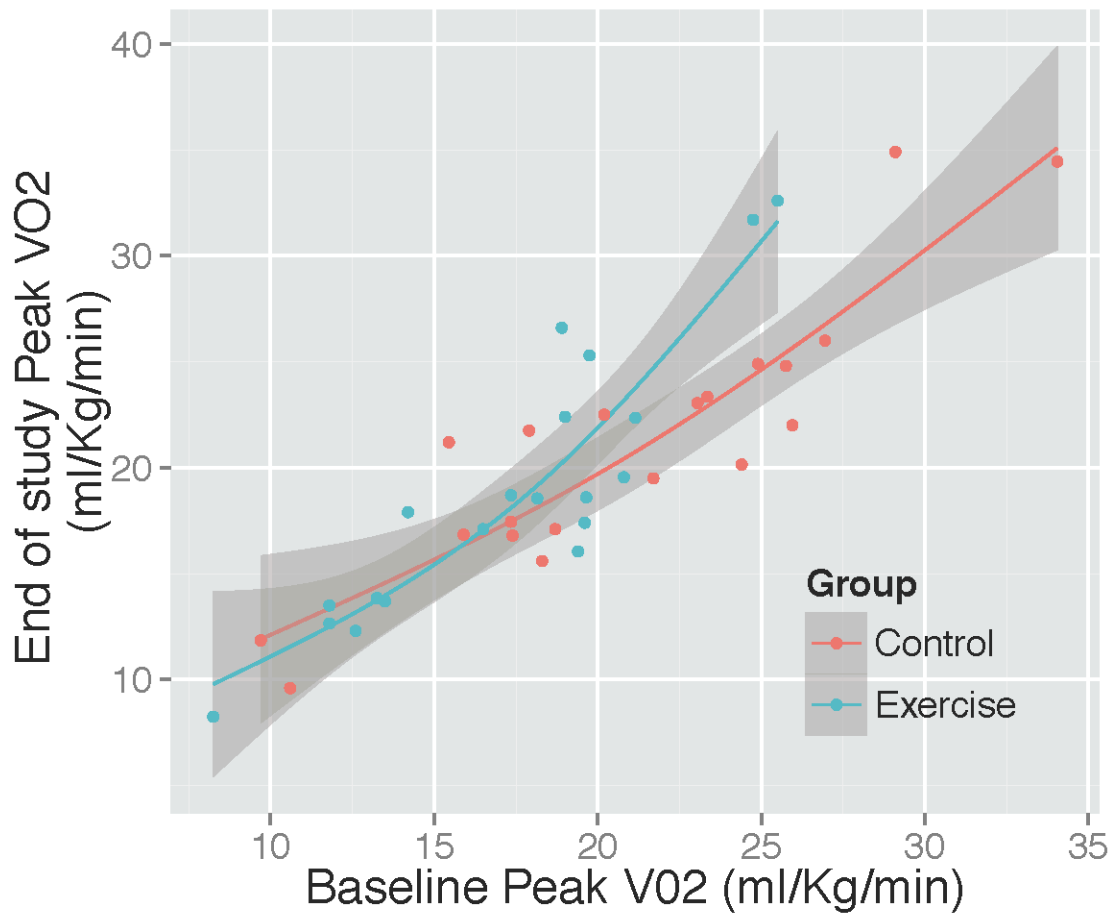

Supplement: 41598_2017_18320_MOESM1_ESM.pdf [file 41598_2017_18320_MOESM1_ESM.pdf]
